# Supplementary material for: Efficient CO2 reduction over a Ru-pincer complex/TiO2 hybrid photocatalyst via direct Z-scheme mechanism
Source: Royal Society of Chemistry journal article supplement (doi:10.1039/d1cy01840j), 2022-01-01
Supplement: d1cy01840j1.pdf [file d1cy01840j1.pdf]

## Electronic supplementary information

### Efficient CO<sub>2</sub> reduction over a Ru-pincer complex/TiO<sub>2</sub> hybrid photocatalyst *via* direct Z-scheme mechanism

Shengtao Chen,<sup>‡</sup> Kan Li,<sup>‡</sup> Haoran Liu, Jing Zhang\* and Tianyou Peng\*

College of Chemistry and Molecular Sciences, Engineering Research Center of Organosilicon Compounds & Materials, Wuhan University, Wuhan 430072, China

<sup>‡</sup> These authors contributed to this work equally.

\* Corresponding authors.

E-mail address: [typeng@whu.edu.cn](mailto:typeng@whu.edu.cn) (T. Peng), [jzhang03@whu.edu.cn](mailto:jzhang03@whu.edu.cn) (J. Zhang)

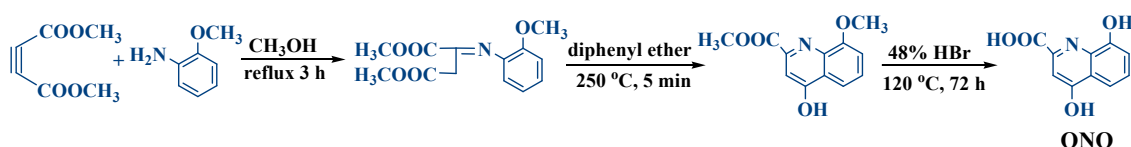

**Scheme S1** Synthesis procedure of the ligand ONO (4,8-dihydroxyquinoline-2-carboxylic acid).

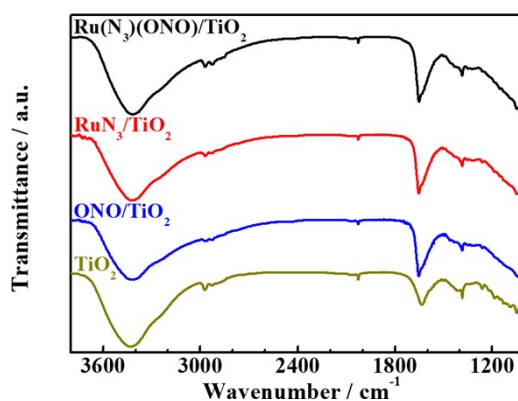

**Fig. S1** FTIR spectra of the single TiO<sub>2</sub> NPs and its hybrid materials (Ru(N<sub>3</sub>)(ONO)/TiO<sub>2</sub>, RuN<sub>3</sub>/TiO<sub>2</sub> and ONO/TiO<sub>2</sub>) with 0.25wt% loading amount.

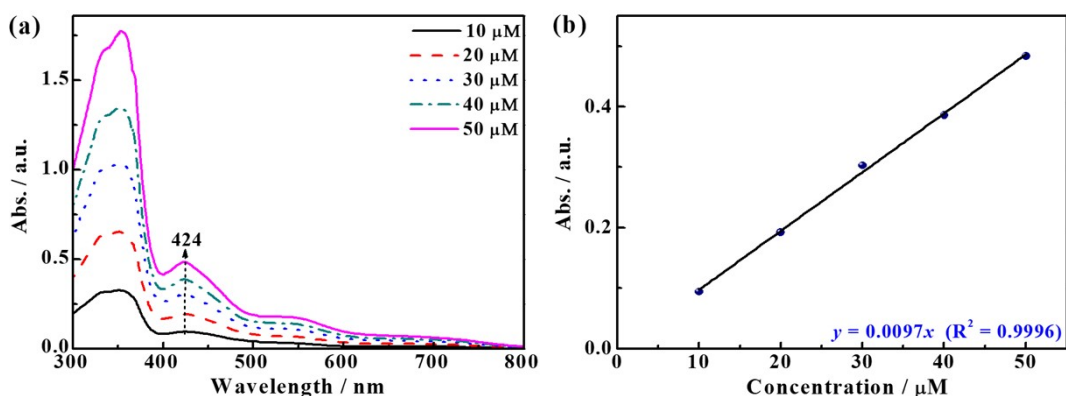

**Fig. S2** UV-Vis absorption spectra and calibration curve of the Ru(N<sub>3</sub>)(ONO) in DMF solutions with different concentrations.

**Table S1** Actual Ru(N<sub>3</sub>)(ONO)-loading amount of the hybrid materials with different additive amounts

| Additive amount / wt% | 0 | 0.05 | 0.13 | 0.25 | 0.50 | 0.10 |
|-----------------------|---|------|------|------|------|------|
| Actual amount / wt%   | 0 | 0.04 | 0.10 | 0.20 | 0.37 | 0.71 |

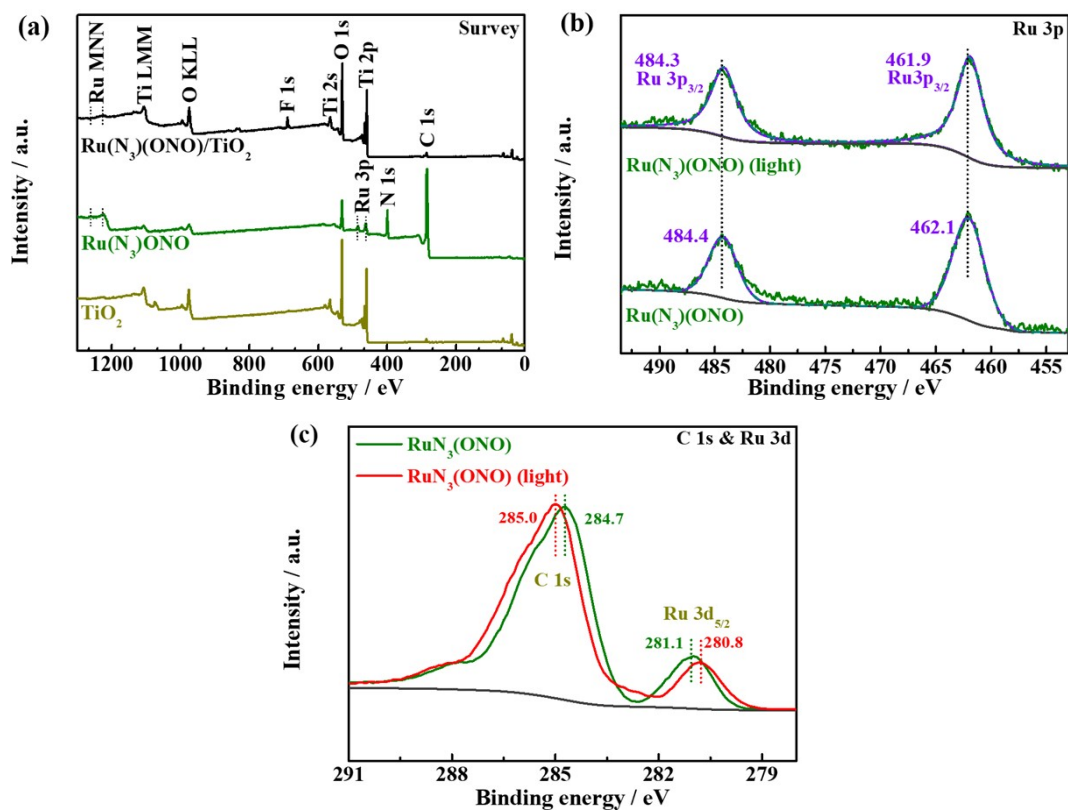**Fig. S3** (a) Survey XPS spectra of the TiO<sub>2</sub> NPs, Ru(N<sub>3</sub>)(ONO) complex and 0.25wt% Ru(N<sub>3</sub>)(ONO)/TiO<sub>2</sub>. High-resolution Ru 3p (b) or C 1s & Ru 3d (c) XPS spectrum of the Ru(N<sub>3</sub>)(ONO) complex in dark or under 300 W Xe-lamp illumination for 15 min.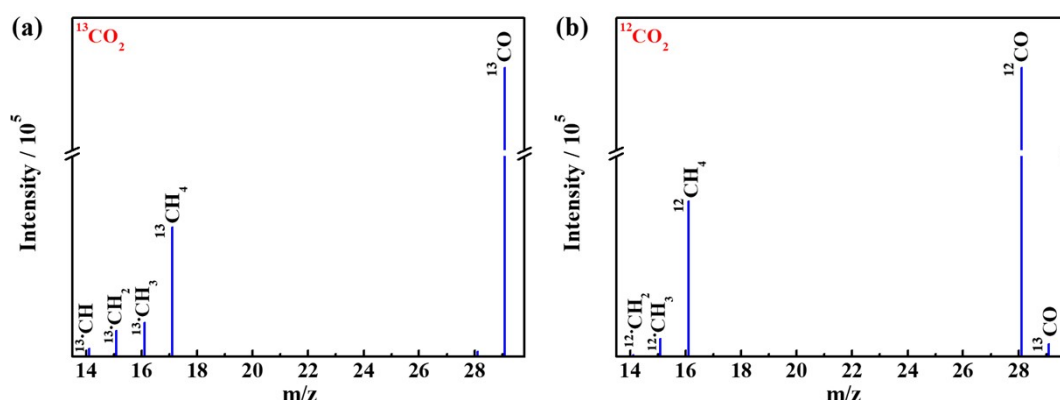**Fig. S4** GC-MS chromatograms of CO/CH<sub>4</sub> produced from the photocatalytic CO<sub>2</sub>RR system containing Ru(N<sub>3</sub>)(ONO)/TiO<sub>2</sub> hybrid material and <sup>13</sup>CO<sub>2</sub> (a) or <sup>12</sup>CO<sub>2</sub> (b) gas as the carbon source.

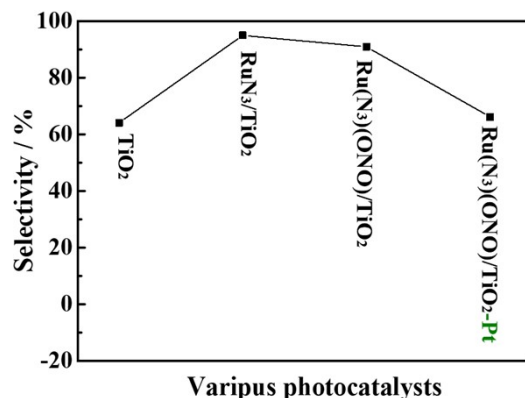

**Fig. S5** CO selectivity of TiO<sub>2</sub> NPs, 0.25wt% hybrid materials and Pt loaded (Ru(N<sub>3</sub>)(ONO)/TiO<sub>2</sub>).

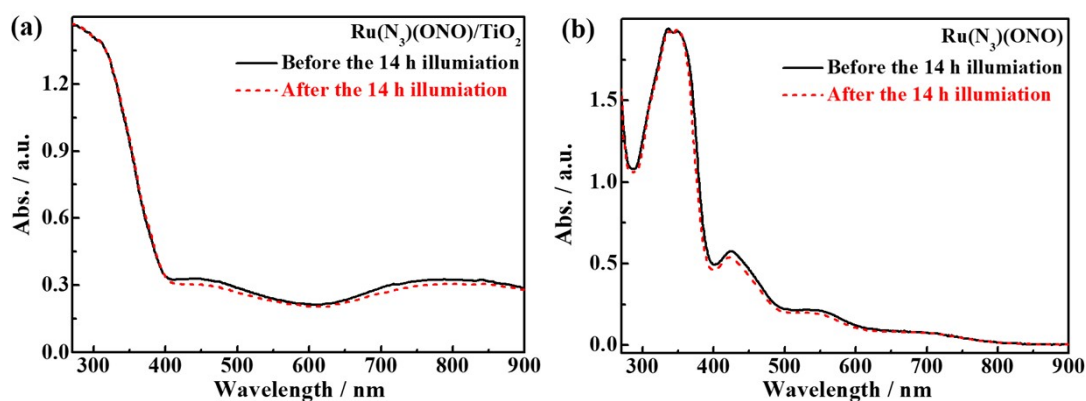

**Fig. S6** (a) DRS spectra of the Ru(N<sub>3</sub>)(ONO)/TiO<sub>2</sub> before/after the photoreaction. (b) UV-Vis spectra of the Ru(N<sub>3</sub>)(ONO) in DMF solutions desorbed from the Ru(N<sub>3</sub>)(ONO)/TiO<sub>2</sub> before/after the photoreaction.

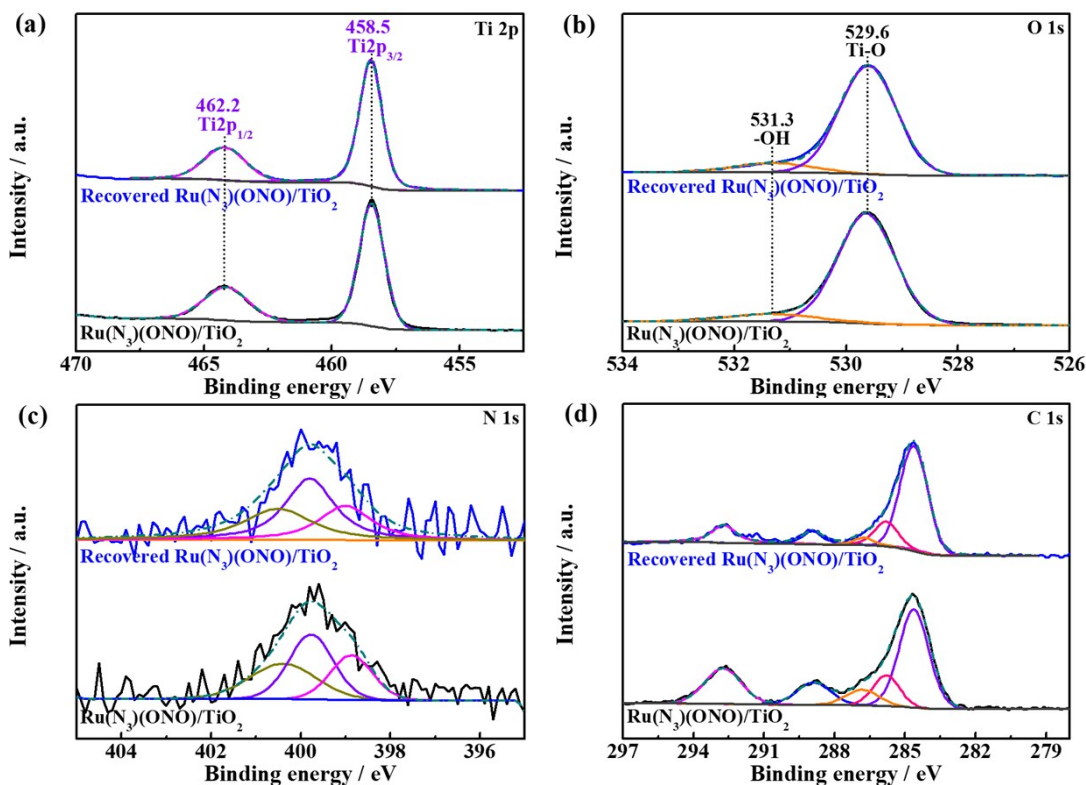

**Fig. S7** High-resolution Ti 2p (a), O 1s (b), N 1s (c) and C 1s (d) XPS spectra of the Ru(N<sub>3</sub>)(ONO)/TiO<sub>2</sub> before and after the 12 h photoreaction.

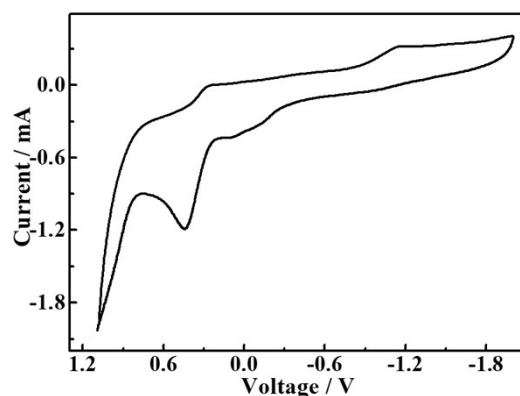

**Fig. S8** Cyclic voltammogram of the Ru(N<sub>3</sub>)(ONO) complex in DMF solution at room temperature.

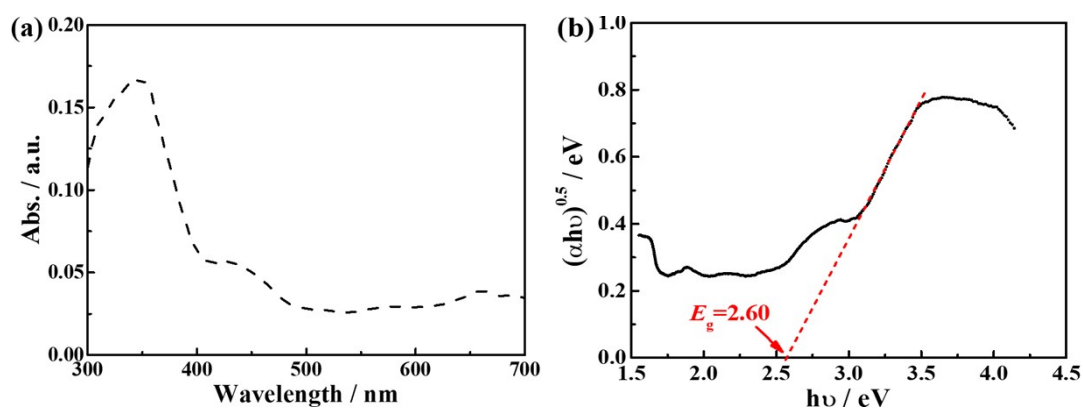

**Fig. S9** UV-Vis DRS spectrum (a) and its Tauc plot (b) of the (Ru(N<sub>3</sub>)(ONO) complex.

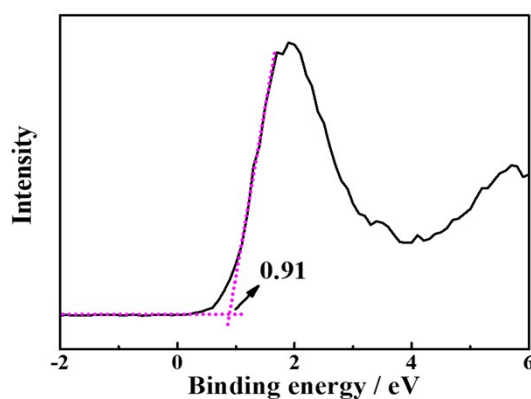

**Fig. S10** VB XPS spectrum of the (Ru(N<sub>3</sub>)(ONO) complex.

**Table S2** Electrochemical data of the Ru(N<sub>3</sub>)(ONO) complex

| Complex        | $E_{\text{ox}} / \text{V vs. SCE}$ | $E_{\text{red}} / \text{V vs. SCE}$ | $E_{0-0} / \text{eV}$ | HOMO <sup>a</sup> / V vs. NHE | LUMO <sup>b</sup> / V vs. NHE |
|----------------|------------------------------------|-------------------------------------|-----------------------|-------------------------------|-------------------------------|
| Ru(II) complex | 0.78 (Oxd <sub>1</sub> )           | -0.62 (Red <sub>1</sub> )           | 2.59                  | 0.99                          | -1.60                         |

<sup>a</sup> Calculated with  $E_{\text{HOMO}} = -(E_{\text{ox}} + 4.71) \text{ eV}$ . <sup>b</sup> Calculated with  $E_{\text{LUMO}} = (E_{\text{HOMO}} + E_{0-0}) \text{ eV}$ .

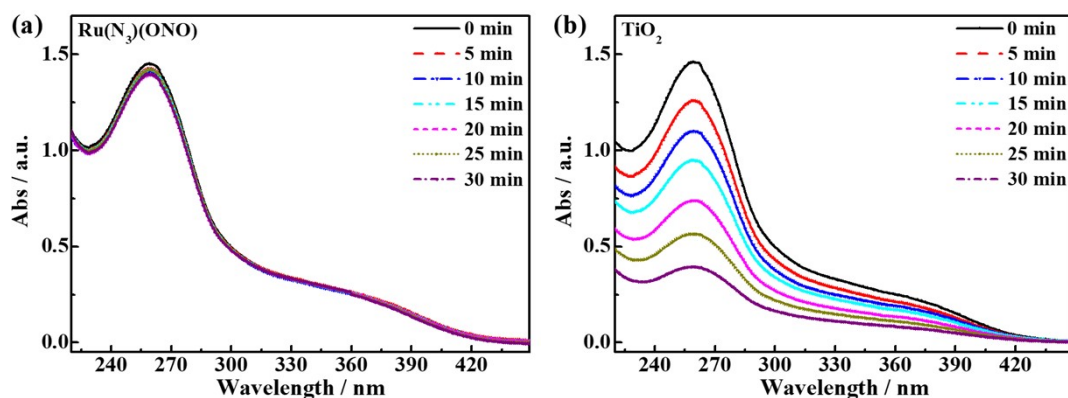

**Fig. S11** UV-Vis absorption spectra of the NBT solution containing Ru(N<sub>3</sub>)(ONO) complex (a) or TiO<sub>2</sub> NPs (b) in dark or under Xe-lamp irradiation.

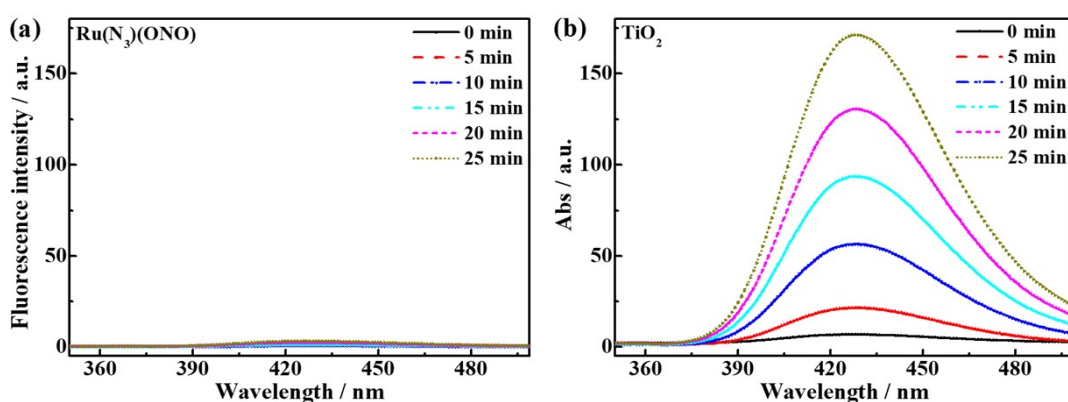

**Fig. S12** Fluorescence spectra of the TA solution containing Ru(N<sub>3</sub>)(ONO) complex (a) or TiO<sub>2</sub> NPs (b) in dark or under Xe-lamp irradiation.

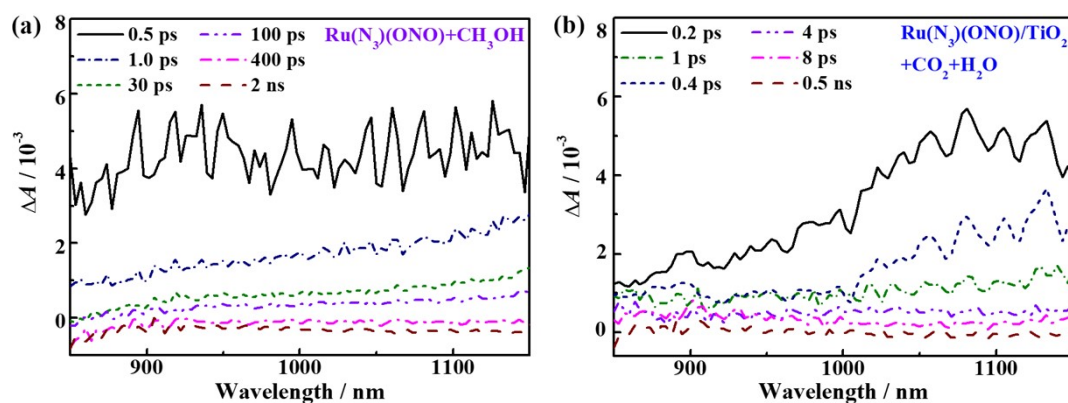

**Fig. S13** The fs-TA spectra in NIR region of (a) Ru(N<sub>3</sub>)(ONO) in MeCN:CH<sub>3</sub>OH (95:5) purged with Ar gas for 15 min and (b) 0.25 wt% Ru(N<sub>3</sub>)(ONO)/TiO<sub>2</sub> in MeCN:H<sub>2</sub>O (95:5) purged with CO<sub>2</sub> gas for 15 min. Excitation with 400 nm light (200  $\mu$ W).

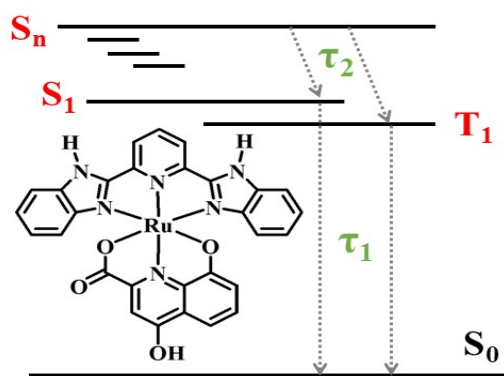

**Fig. S14** Jablonski diagram for the photoinduced dynamics of Ru(N<sub>3</sub>)(ONO) complex in acetonitrile.
